# Supplementary material
Source: Research Square preprint supplement (doi:10.21203/rs.3.rs-9993915/v1)
Supplement: Supplementary file 1 [file 11893d0877b2e7be3f5b4b8d.docx]

**Table S1** List of the 60 black gram genotypes used for this study

| S.No. | Genotypes | S.No. | Genotypes |
| --- | --- | --- | --- |
| 1 | IPU73 | 31 | LBG623 |
| 2 | IPU9612 | 32 | IC321704 |
| 3 | IPU237 | 33 | IC274067 |
| 4 | IPU112 | 34 | IC261173 |
| 5 | IPU101 | 35 | IC321654 |
| 6 | IPU916 | 36 | IC257676 |
| 7 | IPU137 | 37 | IC565286 |
| 8 | IPU243(C) | 38 | IC565254 |
| 9 | IPU116 | 39 | IC565291 |
| 10 | IPU1033 | 40 | IC565276 |
| 11 | IPU0602 | 41 | IC546466 |
| 12 | IPU944 | 42 | IC321762 |
| 13 | IPU1026 | 43 | IC401376 |
| 14 | IPU133 | 44 | IC393528 |
| 15 | IPU99168 | 45 | IC525175 |
| 16 | IPU136 | 46 | IC426766 |
| 17 | IPU926 | 47 | IC436615 |
| 18 | IPU913 | 48 | IC436567 |
| 19 | IPU1023 | 49 | IC436606 |
| 20 | PLU9606 | 50 | IC436635 |
| 21 | PLU826 | 51 | IC436508 |
| 22 | PLU710 | 52 | IC436628 |
| 23 | UH855 | 53 | IC436632 |
| 24 | STY2868 | 54 | IC436621 |
| 25 | PDU1 (C) | 55 | IC337147 |
| 26 | COBG05 | 56 | IC268228 |
| 27 | PSRJ95016 | 57 | IC274608 |
| 28 | WBG108 (C) | 58 | IC343973 |
| 29 | IPU941(C) | 59 | IC331232 |
| 30 | LBG787(C) | 60 | IC331251 |

**Table S2a** List of genomic SSR for black gram

| S.No. | Marker | Original marker ID# | F- Primer | R- Primer |
| --- | --- | --- | --- | --- |
| 1 | VmGEN1 | SSR22941 | GATACGGTGGTGGATGTAGT | GATTGTCATCACAAACACGA |
| 2 | VmGEN2 | SSR22942 | GATACGGTGGTGGATGTAGT | GATTGTCATCACAAACACGA |
| 3 | VmGEN3 | SSR14660 | AAGGTCTCCAATATCTCCTTG | GTTCTTCTTCTTCAGGTGGAC |
| 4 | VmGEN4 | SSR13198 | GCGATGTTTTAGATGTACTGG | AAGACAAATGACCCACCTAGT |
| 5 | VmGEN5 | SSR9277 | GTTGGTGGAGGCTTAGGT | CAACACCACCTCCTATACCAC |
| 6 | VmGEN8 | SSR12492 | GCTTTATACATTGGAGGAGGT | CAATAGTCCTCTTCCACCAC |
| 7 | VmGEN9 | SSR26991 | CTGGGTTCGTGATAGTTTATG | CTCTCTCCTCCATCAGATCAT |
| 8 | VmGEN10 | SSR1022 | CGGTTCACGAAACACTTT | CCCACCTCTTACTCTTCCTT |
| 9 | VmGEN11 | SSR26513 | AACACTAGGGTCATCAAGGAT | TCTCTCTCCAATGCTCTCAT |
| 10 | VmGEN12 | SSR25234 | ACTCGTTACGTTACACTCCAA | TTATTCTCTCTCTCCCTCCAC |
| 11 | VmGEN13 | SSR16014 | CTGATCCACTTCACTACTTGG | AGAAGAAACTGTGGCTGACTA |
| 12 | VmGEN14 | SSR1084 | GTAGCCATCCTCTTCACTGTA | ACCTCCTCGTAGATCGTCTC |
| 13 | VmGEN15 | SSR29430 | TGCACAGGTGGACTATAGATG | GAGTCATACTCCTCCTCATCC |
| 14 | VmGEN16 | SSR29525 | ATGGATGAGTTCCATAGTACG | ACGTAAGTCCTCCTCTGAGTC |
| 15 | VmGEN17 | SSR14760 | CAAACTGACAACAGATGAGGT | TTCCAGAGTGACTCCATACTC |
| 16 | VmGEN18 | SSR24894 | GGAGATGAATTAGAAGCACCT | GGAGTAGGGGTATTCATCTTC |
| 17 | VmGEN19 | SSR24895 | GGAGATGAATTAGAAGCACCT | GGAGTAGGGGTATTCATCTTC |
| 18 | VmGEN20 | SSR4726 | AGGAGGTGGAGAATAAGATGA | GCCCAAGAGGATAAAGATAAG |
| 19 | VmGEN21 | SSR13003 | CTTCTTCTTCTTCTTCCTCGT | GTGGTGACATTAGTGGAGAAA |
| 20 | VmGEN22 | SSR4265 | TCCTCACTGTTTTCTAGCTCA | GATGTTAACCCTAAGGAGGAA |
| 21 | VmGEN23 | SSR33263 | GCACCTAACCCTTGACTTC | AGCCAGACTCTTTGTCTTCTT |
| 22 | VmGEN25 | SSR22802 | ATAGCCTTCACCTCCATTTC | GAAGGAGAAGGTCATGGTAGT |
| 23 | VmGEN26 | SSR14732 | ACTAAGCTCTCGAAGACCAAC | CTGACTCCCAACTCTAGTCCT |
| 24 | VmGEN27 | SSR15024 | AGCCAGACTCTTTGTCTTCTT | GCACCTAACCCTTGACTTC |
| 25 | VmGEN28 | SSR14684 | ATACTACCTCAGAACGGGAAG | ACACAGTACATGATCCAGAGG |
| 26 | VmGEN29 | SSR31500 | CCACTACCTTTAGCACCACTA | GTGATGGTTGTGTTGGTTG |
| 27 | VmGEN30 | SSR9767 | GGTGGTTCTTCTTCTCTAGGT | AAGGTCTCCAATATCTCCTTG |
| 28 | VmGEN31 | SSR24811 | GCTACTTGTCACAGGAATGAG | TCATACAAAGGAGGAGGTACA |
| 29 | VmGEN33 | SSR30447 | CCTTAACTCATCAGCATTGAC | GAGTCTTAGCTCAAGGGAACT |
| 30 | VmGEN34 | SSR6001 | CTAACAGATATGTGCCTCCAC | TCTGCATAGTCATCTGTCTCA |
| 31 | VmGEN35 | SSR33061 | CTAACAGATATGTGCCTCCAC | TCTGCATAGTCATCTGTCTCA |
| 32 | VmGEN37 | SSR19630 | GAGGTCCTAGTCCATGGTTAC | TGATATCGACTCATGAGGAAC |
| 33 | VmGEN38 | SSR7610 | TACGTACTTTGTCTCGTAGCC | ACTCGTAACTCCCTCGTTTAC |
| 34 | VmGEN39 | SSR28109 | GACTAGCTCGTGAACCTAACA | GAACTGGCAAAGGATACAAC |
| 35 | VmGEN40 | SSR5955 | CATCAGAGTCCTCATCATCTC | AGGTGGACTATGGACAAGTTT |
| 36 | VmGEN41 | SSR4921 | CTCCTCTTCATCCTTAGCATC | GGACTATGGATGAGTTCAACA |
| 37 | VmGEN42 | SSR31285 | TTATCCGAGTCGTATCATCC | TATGGACGAGTTCCATAGTGT |
| 38 | VmGEN43 | SSR31071 | AAACTCCTTGTCTAAGTGCTG | AGGCATAGGGTAGTAGGTTTG |
| 39 | VmGEN44 | SSR9842 | GATGCTATGTAAGCTCCTCAA | AACAGGCGTAGGGTAGTAGAT |
| 40 | VmGEN46 | SSR14563 | CCACTGGATGCAATAGTAGAG | CCTTAAAGGGTGTACTTTGGT |
| 41 | VmGEN47 | SSR16796 | ATAGGTAAGCAAGGAGGTGTC | GAGCAGGACGAGTTTATACAG |
| 42 | VmGEN48 | SSR5397 | ATCGTGAGGAGGACTATGTTC | TAGTGTGTAAGCAAGGAGGTG |
| 43 | VmGEN50 | SSR32416 | GACGGCTCTACCTAAAACACT | AGAGAAAAGGGAGAGAGAATG |
| 44 | VmGEN51 | SSR9728 | CTCATCTGCATCATCCTTATC | ATGAGTTCAACAACAGAGTGG |
| 45 | VmGEN52 | SSR13909 | TCCTCATCTGAGTCATCCTTA | ATGAGTTCAACAACAGAGTGG |
| 46 | VmGEN54 | SSR11982 | CCATCTTCTAGTTCCTTCACC | GTCCACTCTCAGTGTCCTTTA |
| 47 | VmGEN55 | SSR15165 | CTTCTCCTCCTGCTCATACAT | GAATCAAACTCTGGGATCTTC |
| 48 | VmGEN56 | SSR831 | CCACTACTTGAAAATGCTGAG | TCCACTTGTACCACTGTCTCT |
| 49 | VmGEN57 | SSR12112 | GGAAAGCTCTTCACTTCAACT | GTTCTGTTCTCTTCTGGTCCT |
| 50 | VmGEN58 | SSR2672 | CATGAACTCCTCTGCATCTTA | GCTGCATTTGAAGAGGTTAC |
| 51 | VmGEN61 | SSR3877 | AGATACGAGTGGGTAACCTGT | CATACTACCTCAGAACGGAAA |
| 52 | VmGEN62 | SSR14471 | CTTAGAAGGATGCAATGGAG | CTTGGAGTCACCAAACACTAC |
| 53 | VmGEN63 | SSR13812 | AGTAACAGTGTTGTGGACGAA | CACTCAAGTTAGACCCAGATG |
| 54 | VmGEN64 | SSR10540 | AGAGGGCTTACTCATTGATTC | ATACTACCTCAGAACGGGAAG |
| 55 | VmGEN65 | SSR4313 | AGAGGGCTTACTCATTGATTC | ATACTACCTCAGAACGGGAAG |
| 56 | VmGEN66 | SSR7496 | AGAGGGCTTACTCATTGATTC | ATACTACCTCAGAACGGGAAG |
| 57 | VmGEN67 | SSR11862 | AGAGGGCTTACTCATTGATTC | ATACTACCTCAGAACGGGAAG |
| 58 | VmGEN68 | SSR7609 | AAGGTCTCCAATATCTCCTTG | AGGTGGACCTTCTTCTTCTT |

# The genomic markers used in this study, along with their original marker IDs, were obtained from Jegadeesan et al. (2021).

**Table S2b** List of genic SSR for black gram along with the function

| S.No. | Marker | Original marker ID# | F- Primer | R- Primer | Function |
| --- | --- | --- | --- | --- | --- |
| 59 | VmEST1 | VMgSSR910 | ATAAGGTGAGGCTGAAGCTGAA | GGCTCTTACATGGTATCAAATCCT | aquaporin PIP2-2-like" |
| 60 | VmEST2 | VMgSSR291 | TAGGGAAAGTTCAAAGGCAGAA | AGAGCGCAAAGCTCAACTAAAA | peroxiredoxin-2B-like" |
| 61 | VmEST3 | VMgSSR778 | AGCCGAGGTTGGTAAAGTAAGG | TACACTATTCCCTCCCCTCTCC | cysteine-rich protein" |
| 62 | VmEST4 | VMgSSR666 | CACAGCTCCGACACTCTCAC | AATTCAGGTTCAGGTTGAGGAA | peroxygenase isoform X2" |
| 63 | VmEST5 | VMgSSR589 | CTGTCTGCGATGTATTTTCTGG | CGTGGTCTCTATGTCCATGTTG | SCY1-like protein 2" HEAT repeat" |
| 64 | VmEST6 | VMgSSR216 | GCCAATCAGTTTACCACATTCA | GGCAAGTCACACCAACAATAAC | protein ABC transporter 1, mitochondrial" |
| 65 | VmEST8 | VMgSSR862 | ACCATCCATATTCCTCCATCAC | ACCATCTTTCTGTTGAGCCTGT | abscisic acid receptor PYL9" |
| 66 | VmEST9 | VMgSSR146 | ACAGTTGCCTTTGTTTGAAGGT | TGTATCCTCAGCCACATAGCAG | dehydration-responsive element-binding protein 2D" |
| 67 | VmEST10 | VMgSSR181 | GCCAAGCAAATTAGACCAAATC | GCACCTTGCCTTATCTAGCTGT | transcription factor bHLH68-like" |
| 68 | VmEST11 | VMgSSR247 | CCACGGTCTCTACTACCTCCAT | GAGAGGATTTGGATTTGTGACC | HVA22-like protein a" |
| 69 | VmEST12 | VMgSSR252 | CAGTTCCTGCACCACCATATC | GAGGTGATCCTTCTCTTGGGTA | late embryogenesis abundant protein At3g53040" |
| 70 | VmEST13 | VMgSSR1 | CATGACCCCATACGGCTAAC | AGTCCCAAAGAAAAGAACCTCC | seed linoleate 9S-lipoxygenase-3" |
| 71 | VmEST18 | VMgSSR17 | CTGATAGTGATAGCTGTTCTGAGTTCT | GAAGAAGATGGGGATGATTTTG | 18 kDa seed maturation protein" |
| 72 | VmEST19 | VMgSSR48 | TTTCTCTCCTGCTCCTCTTGC | CTCCGCTCTTAAATCATCGTTC | sucrose-binding protein-like" |
| 73 | VmEST20 | VMgSSR58 | GACGAAGCAATTCCAAACACTT | GTGATGCTGACGAAAGTCTCAA | NDR1/HIN1-like protein 12", LEA_2" |
| 74 | VmEST21 | VMgSSR630 | ACTTGAATGAATGGGAAACTGC | GCGTGTTGTTGCTATTGTTACC | 18 kDa seed maturation protein LEA_1 |
| 75 | VmEST22 | VMgSSR532 | GAGGGAAGATGACAAATGTTGG | GCTAAAATGTGCAGAACTGTCG | galactinol synthase 2, raffinose biosynthesis osmoprotectant |
| 76 | VmEST23 | VMgSSR577 | AGGGGTAGTAGGAAGGAAGGTG | CATGTAGACAAAAGCCAACAGG | DNA-binding protein S1FA-like" |
| 77 | VmEST25 | VMgSSR389 | TCCTTCTTTAATTCCAGGCTCA | TGTTGCAGTAAACCATTTCCAC | P34 probable thiol protease |
| 78 | VmEST26 | VMgSSR454 | GAAAACCAACAACCATCACTCA | CACACTTCCGTCTATGCTCAAG | NAC domain-containing protein 2 |
| 79 | VmEST27 | VMgSSR502 | GGTCTCTCACATGCTCTATGGC | GAGTGGTTATTTGCACCATTGC | proton pump-interactor 1(LOC106755005), transcript variant X2 |
| 80 | VmEST28 | VMgSSR544 | CAAATGGGCATAGAGTTTCACA | GGCTAAAGAAATGGCAGAAAGA | glutathione S-transferase F9 |
| 81 | VmEST29 | VMgSSR238 | GAAAGGGAAAGGGATAAGGATG | AGAGTGTAGTGCAGAGAGCACG | heat shock 70 kDa protein |
| 82 | VmEST31 | VMgSSR627 | ATGAAAATAAAGGTGGGTGGTG | CCGTGGATCTGGAAGGTAAATA | E3 ubiquitin-protein ligase PRT1 isoform X2" |
| 83 | VmEST33 | VMgSSR588 | AAGAGAGCCGTGAACGTAAAAC | GTTGCGGGATAGAAAAGAGTGT | NADPH-dependent aldehyde reductase 1, chloroplastic |
| 84 | VmEST34 | VMgSSR321 | GAAGGTAGAGCCGAAGTTGTTG | TCCCTTATTCATTTGTTCCCAC | dehydrin DHN3-like |
| 85 | VmEST35 | VMgSSR426 | AGAGACATAAAGCCTGCCAATC | AGCATCAACAAAGGAGCAGAAT | nuclear transcription factor Y subunit A-1 (LOC106765051), transcript variant X2 |
| 86 | VmEST36 | VMgSSR811 | AGATAGAAGGCGAAGCGTTATG | GAGAGAGGTGAAGGTGGAAAAG | probable glycosyltransferase |
| 87 | VmEST37 | VMgSSR853 | CATGGACACCAAAAGAGGGTAT | AAAACAAACCATCCTCAACAGG | defensin (D1) gene |
| 88 | VmEST38 | VMgSSR808 | CTCTGCGAAGGAAAAGTCAGTC | GAACCGCCTCCAGTCCTC | xanthine dehydrogenase 1 |
| 89 | VmEST40 | VMgSSR729 | CCTCCCACTACTGATTGCCTAA | GCCGTAATTCACCCATTTGTA | probable aquaporin TIP-type alpha |
| 90 | VmEST41 | VMgSSR683 | CCAAATGACCACACATAACACC | AAAAGTTGAAAACGAGCGAGAG | probable phospholipid hydroperoxide glutathione peroxidase |
| 91 | VmEST42 | VMgSSR701 | CCCTCTCTATTTGCACGAAAAC | AGGTAGGAACCCACTACGGAAT | 4-alpha-glucanotransferase, chloroplastic/amyloplastic |
| 92 | VmEST44 | VMgSSR9 | GATCTCCGAAGGTTGAGAAGAA | TCCAACACACTATTCGCTCTTT | cysteine-rich protein |
| 93 | VmEST45 | VMgSSR14 | GGGGAGGAAAGAGAAGAAAGAA | CTGAGAAGAAACAAGGGTGGAG | glycinin G4 |
| 94 | VmEST46 | VMgSSR29 | CAACCCCATCTCTCATTTTGTT | GTTTGCTTGTGTCGTTTTGAAG | protein TIC 40, chloroplastic" |
| 95 | VmEST47 | VMgSSR32 | CCAACACCACCCAACTAATTTT | TTACATGCAGAGGAGTACCCAA | defensin-like protein" |
| 96 | VmEST48 | VMgSSR697 | TTCCCTTAAAAGCAGATGGAAC | CTGTTGTGGAAGATGAAACCAA | importin subunit beta-1" |
| 97 | VmEST49 | VMgSSR564 | GATTTCGTACACCCCAACAGAT | GCTTAACAGTCAGATTCGTGGA | 4-alpha-glucano transferase,chloroplastic /amyloplastic" |
| 98 | VmEST50 | VMgSSR450 | AAGCAGATGGAGGAGAGTGAAG | AGAGCAGAGAAGGAGCAACATT | peroxygenase isoform X2" |
| 99 | VmgEST8 | VMgSSR14 | GGGGAGGAAAGAGAAGAAAGAA | CTGAGAAGAAACAAGGGTGGAG | glycinin G4 |
| 100 | VmgEST10 | VMgSSR17 | CTGATAGTGATAGCTGTTCTGAGTTCT | GAAGAAGATGGGGATGATTTTG | 18 kDa seed maturation protein" |
| 101 | VmgEST11 | VMgSSR23 | TCGTTGGACCTAGTAACCTTGT | AATTGGTACATCCTCCATCATC | cysteine-rich protein mRNA |
| 102 | VmgEST14 | VMgSSR31 | ACTGCTGGAAACCAAGAAATGT | ACAACGAAGGCAAGTACAACCT | beta-conglycinin beta subunit 1-like |
| 103 | VmgEST15 | VMgSSR33 | CTTCTGTTGTCCACCATTCTTG | CCGTGCTAGTGAAACGAATTTT | probable aquaporin TIP-type alpha |
| 104 | VmgEST16 | VMgSSR34 | AGAGGGGTAAAGCCATGTGTTA | GGGATTATAGAGGACGAAAGGG | beta-conglycinin beta subunit 1 |
| 105 | VmgEST23 | VMgSSR54 | CTTCATGCGGTAAATCTTAGGG | GAAAGGTTAGGGGTACTTTGGG | beta-conglycinin beta subunit 1-like |
| 106 | VmgEST25 | VMgSSR57 | CTTGGAAGAGGTAGTTGCCTTG | TCCAGAAATTAGAGGTGTGAGTGA | beta-conglycinin, beta chain-like |
| 107 | VmgEST33 | VMgSSR76 | TTTAGGTGTCCTTGGTTTGCTT | TATGGTTGGCTTGTCTACATGG | 18 kDa seed maturation protein |
| 108 | VmgEST58 | VMgSSR138 | CACATTAGGAGCAGTTTTGCAC | GATCTGGTGTTGGTGTCAGTGT | oil body-associated protein 2B |
| 109 | VmgEST60 | VES0019 | GGCTCACACTCATTCTTCCC | TCACACGAGCTGTCTATGCC | chaperone protein dnaJ C76, chloroplastic |
| 110 | VmgEST61 | VES0287 | ACCTTCACTCCCTCCATTCC | GTGTCCGTACATTGCTGGTG | GATA transcription factor 25 (LOC114193082), |
| 111 | VmgEST66 | D102666 | TACGAGGCATTTGGTTTGACAGTG | AGCCGGTTCCTCCATTTCTT | Vigna radiata sucrose synthase |
| 112 | VmgEST72 | VMgSSR143 | CCCTGTTTGTCTCTTTCTCTGG | GATAACCTTGGTGGAAGAATCG | TBCC domain-containing protein 1-like |
| 113 | VmgEST75 | VMgSSR149 | CTTCTCAATCTGCTGAACCTCC | GTTGCTGTTGTTGCTCTTCATC | beta-conglycinin alpha subunit 2 |
| 114 | VmgEST81 | VMgSSR158 | TCCCTTCCAAAATAGTGTCAGC | GTGAGAAACGAGGAGAAGACGA | beta-conglycinin, beta chain-like |
| 115 | VmgEST70 | CLM451 | ACAATGGACACAACCAACCT | CTTGAAGACAGGTTCCTGAAA | Leaf senescence-associated receptor-like protein kinase (*Phaseolus vulgaris*) |
| 116 | VmgEST69 | CLM446 | TCCTCTGTCCTTTCTTTCTCTTT | TGGAAGTTAAGACCCACCAG | Vigna unguiculata alpha/beta hydrolase domain-containing protein |
| 117 | VmgEST50 | VMgSSR118 | AATGGCTAGGGACACAAAACAC | GACCCTGATTTTACATGGGAAG | beta-conglycinin beta subunit 1-like |
| 118 | VmgEST49 | VMgSSR112 | ATCTCCAAAGCTACCCTTCTCC | ATGTTTAATCCAACGACCCTCA | beta-conglycinin beta subunit 1 |
| 119 | VmgEST48 | VMgSSR109 | CCCAGTGCCAACAGCACA | GGGATTGATGACGGAGAAATTG | cysteine-rich protein mRNA |
| 120 | VmgEST83 | VMgSSR161 | GTGGGAGTGAAAGAAGAAAGCA | TTTTCGGTAACTTCAATGCTCC | probable aquaporin TIP-type alpha |
| 121 | VmgEST2 | VMgSSR4 | AAGGAAGAAACCCACACAAGAA | TCGATTGAAGAGCAAGAAGTGA | plant defensin (D1) gene |
| 122 | VmgEST80 | VMgSSR157 | CTTGGAAGAGTCAAACAACACG | GGAGGATGAACAAGGTGAAGAA | dirigent protein 24-like |
| 123 | VmgEST71 | VMgSSR142 | AATGTCTCCGTTATCGAGGGT | AACACCAAGAAAAGCGAGGAG | E3 ubiquitin-protein ligase |
| 124 | VmgEST73 | VMgSSR145 | CTCAGTCGATTTGCAGTTTCAG | CTGGTTTCTGCCTATACCGAAG | beta-conglycinin, beta chain-like |
| 125 | VmgEST74 | VMgSSR147 | TCAACATCCTCGGTCTCCTATT | TCGTACTCTTGTTTCTGCTCCA | beta-conglycinin, beta chain-like |
| 126 | VmgEST77 | VMgSSR152 | AGACTCAAGGAAGGTGAAGCAG | GAGCAGCATCAAGTGACGTATC | late embryogenesis abundant protein D-34 |
| 127 | VmgEST78 | VMgSSR153 | CTAATGAAGGAGGAGGAAGGGT | GAATACGGTTCCAGTAAGGTGG | beta-conglycinin, alpha' chain |
| 128 | VmgEST79 | VMgSSR156 | CGGTAGCGTGAGGAATGATAGT | GCCAAGCAGGATACAGTTCAGT | cysteine-rich protein mRNA |
| 129 | VmgEST82 | VMgSSR160 | TATTTAGATGCGTCCTGTTTGC | CATGTCTCGCCATAACAACACT | cysteine-rich protein mRNA |
| 130 | VmgEST84 | VMgSSR163 | TATTCATGTTACTTCCCACCCC | TGAACGAAGAGAACCCCATAAC | dehydrin DHN3 |

#The genic markers used in this study, along with their original marker IDs, were obtained from Souframanien et al. (2015).

**Table S3** Combined ANOVA for morpho-physiological traits in black gram evaluated under control and stress condition

| Sources of Variances | df | DF | PH | BN | CN | PL | SPP | HSW | SY |
| --- | --- | --- | --- | --- | --- | --- | --- | --- | --- |
| Replication | 2 | 13.25** | 35.48** | 1.64 | 0.14 | 0.17* | 1.57** | 6.95** | 2.48* |
| Treatment | 1 | 246.68** | 2613.61** | 230.40** | 1078.14** | 31.09** | 126.62** | 46.89** | 516.79** |
| Genotype | 59 | 4.59** | 129.42** | 1.86** | 18.73** | 0.35** | 1.09** | 0.49** | 6.74** |
| Treatment× Genotype | 59 | 0.28 | 17.81** | 0.69 | 6.7** | 0.12** | 0.12 | 0.06 | 1.51** |
| Error | 238 | 0.73 | 2.68 | 0.61 | 1.5 | 0.04 | 0.22 | 0.07 | 0.64 |
| GM |  | 36.19 | 31.01 | 4.76 | 11.06 | 4.46 | 5.78 | 4.04 | 7.05 |
| CV (%) |  | 2.37 | 5.28 | 16.42 | 11.07 | 4.44 | 8.13 | 6.51 | 11.35 |
| LSD0.05 |  | 0.18 | 0.34 | 0.16 | 0.25 | 0.04 | 0.10 | 0.05 | 0.17 |

| Sources of Variances | df | RWC | MSI | Chlo | Proline | TSS | NDVI | SPAD | CTD |
| --- | --- | --- | --- | --- | --- | --- | --- | --- | --- |
| Replication | 2 | 12.68** | 0.26 | 0.02 | 0.39 | 16.10** | 0.0001 | 3.12 | 0.91** |
| Treatment | 1 | 6403.20** | 11474.28** | 114.51** | 6659.08** | 9774.24** | 1.91** | 1098.30** | 321.80** |
| Genotype | 59 | 67.18** | 124.41** | 0.53** | 53.36** | 84.59** | 0.01** | 21.74** | 2.91** |
| Treatment×Genotype | 59 | 24.64** | 25.12** | 0.14** | 18.94** | 13.69** | 0.01** | 6.25** | 1.14** |
| Error | 238 | 2.20 | 1.70 | 0.08 | 0.27 | 1.29 | 0.00 | 1.81 | 0.14 |
| GM |  | 79.74 | 48.28 | 3.59 | 10.16 | 18.44 | 0.73 | 42.01 | 3.34 |
| CV (%) |  | 1.86 | 2.7 | 8.04 | 5.12 | 6.15 | 3.09 | 3.21 | 11.25 |
| LSD0.05 |  | 0.31 | 0.27 | 0.06 | 0.11 | 0.24 | 0.00 | 0.28 | 0.08 |

*, **= significant at the 5% and 1% level of significance respectively

Where, df= Degrees of freedom, DF= days to 50% flowering, PH= Plant height (cm), BN= branch number, CN= cluster number, PL= pod length (cm), SPP= seeds per pod, HSW= hundred seed weight, SY= seed yield(g/plant), RWC= relative water content (%), MSI= membrane stability index (%), Chlo = total chlorophyll content (mg/gm FW), proline (µg/g FW), TSS= total soluble sugar (mg/g FW), NDVI= normalized difference vegetation index, SPAD= chlorophyll meter reading (SCMR), CTD= Canopy Temperature Depression (°C), GM= grand mean, CV= coefficient of variance and LSD= Least Significant Difference.

**Table S4** Genotype mean, grand mean and LSD values for various morpho-physiological tested under control and stress conditions.

| **Genotypes** | **Trt** | **RWC** | **MSI** | **Chlo** | **Proline** | **TSS** | **NDVI** | **SPAD** | **CTD** | **DF** | **PH** | **BN** | **CN** | **PL** | **SPP** | **HSW** | **SY** |
| --- | --- | --- | --- | --- | --- | --- | --- | --- | --- | --- | --- | --- | --- | --- | --- | --- | --- |
| COBG05 | Control | 85.38 | 48.53 | 5.02 | 5.79 | 12.05 | 0.76 | 43.53 | 5.10 | 38.00 | 29.08 | 3.98 | 12.22 | 4.01 | 5.95 | 4.28 | 6.50 |
|  | Stress | 82.72 | 42.72 | 3.25 | 8.33 | 20.00 | 0.60 | 41.43 | 2.93 | 36.17 | 26.52 | 3.23 | 8.22 | 3.71 | 5.25 | 3.90 | 5.42 |
| IC257676 | Control | 80.15 | 51.48 | 4.04 | 4.48 | 13.33 | 0.86 | 44.83 | 4.27 | 40.75 | 47.22 | 4.93 | 9.27 | 4.17 | 5.88 | 4.47 | 7.69 |
|  | Stress | 75.61 | 41.43 | 3.06 | 7.32 | 17.53 | 0.74 | 43.27 | 3.03 | 39.00 | 42.00 | 4.08 | 8.40 | 3.75 | 4.97 | 4.02 | 5.59 |
| IC261173 | Control | 83.63 | 63.12 | 3.41 | 4.82 | 11.40 | 0.85 | 44.27 | 4.67 | 38.83 | 34.97 | 4.53 | 10.12 | 4.40 | 6.33 | 4.62 | 7.49 |
|  | Stress | 78.54 | 42.00 | 2.50 | 7.25 | 18.32 | 0.57 | 42.33 | 3.73 | 37.17 | 27.75 | 3.52 | 7.58 | 4.12 | 5.47 | 4.15 | 6.10 |
| IC268228 | Control | 83.70 | 55.00 | 3.83 | 3.97 | 10.28 | 0.85 | 44.73 | 4.13 | 38.58 | 36.42 | 5.33 | 13.25 | 4.31 | 6.28 | 4.17 | 8.06 |
|  | Stress | 66.24 | 44.33 | 3.08 | 6.05 | 13.49 | 0.72 | 40.53 | 2.07 | 37.00 | 33.68 | 3.72 | 10.07 | 3.84 | 5.27 | 3.64 | 6.74 |
| IC274067 | Control | 84.79 | 52.87 | 4.43 | 5.10 | 8.46 | 0.82 | 39.77 | 4.47 | 38.33 | 28.07 | 5.15 | 11.60 | 4.32 | 6.17 | 4.12 | 6.61 |
|  | Stress | 78.90 | 46.33 | 3.07 | 13.39 | 18.19 | 0.62 | 39.30 | 3.53 | 36.67 | 25.72 | 3.78 | 8.10 | 3.78 | 5.47 | 3.75 | 5.19 |
| IC274608 | Control | 85.61 | 60.07 | 3.82 | 2.93 | 14.79 | 0.84 | 45.67 | 3.80 | 38.00 | 33.30 | 4.99 | 12.78 | 4.56 | 6.00 | 4.51 | 7.06 |
|  | Stress | 75.34 | 46.50 | 2.50 | 6.61 | 25.02 | 0.62 | 39.97 | 3.10 | 36.42 | 27.02 | 3.72 | 10.73 | 4.04 | 5.30 | 3.85 | 5.44 |
| IC321654 | Control | 84.10 | 56.21 | 3.76 | 3.18 | 11.00 | 0.77 | 46.57 | 4.77 | 39.67 | 39.93 | 5.12 | 11.53 | 4.11 | 5.93 | 4.11 | 7.41 |
|  | Stress | 76.53 | 43.50 | 3.28 | 9.01 | 23.62 | 0.66 | 40.70 | 2.80 | 38.42 | 37.63 | 4.20 | 8.48 | 3.74 | 4.78 | 3.73 | 6.43 |
| IC321704 | Control | 81.55 | 57.33 | 4.24 | 4.04 | 13.29 | 0.73 | 47.60 | 3.70 | 37.92 | 33.98 | 5.08 | 9.87 | 3.97 | 6.07 | 4.11 | 7.16 |
|  | Stress | 74.07 | 44.60 | 2.98 | 8.48 | 18.81 | 0.67 | 39.17 | 1.43 | 36.08 | 31.45 | 4.23 | 8.28 | 3.74 | 5.25 | 3.61 | 5.85 |
| IC321762 | Control | 87.28 | 57.33 | 4.38 | 5.35 | 12.16 | 0.81 | 42.83 | 3.40 | 45.25 | 51.00 | 5.70 | 12.38 | 4.58 | 6.93 | 4.02 | 7.60 |
|  | Stress | 76.58 | 47.90 | 3.68 | 20.63 | 19.23 | 0.72 | 39.07 | 2.40 | 42.83 | 41.23 | 4.62 | 9.50 | 4.12 | 5.80 | 3.49 | 5.87 |
| IC331232 | Control | 84.40 | 59.29 | 4.17 | 6.10 | 18.73 | 0.76 | 42.43 | 4.23 | 37.58 | 37.28 | 4.07 | 11.37 | 4.59 | 6.53 | 4.42 | 8.27 |
|  | Stress | 74.78 | 47.77 | 2.43 | 11.73 | 28.16 | 0.74 | 38.10 | 1.77 | 36.08 | 30.47 | 3.63 | 9.67 | 4.30 | 5.73 | 4.01 | 6.76 |
| IC331251 | Control | 82.52 | 58.55 | 4.26 | 3.07 | 15.59 | 0.83 | 43.40 | 4.53 | 37.92 | 37.52 | 4.60 | 11.57 | 4.41 | 5.90 | 4.39 | 8.14 |
|  | Stress | 79.08 | 47.55 | 2.69 | 9.58 | 24.25 | 0.70 | 35.83 | 3.90 | 36.42 | 31.15 | 3.73 | 10.17 | 3.94 | 5.13 | 3.98 | 6.19 |
| IC337147 | Control | 80.66 | 55.67 | 4.65 | 3.11 | 12.99 | 0.81 | 43.20 | 4.00 | 36.33 | 33.75 | 4.72 | 11.62 | 4.31 | 6.10 | 4.46 | 7.06 |
|  | Stress | 71.11 | 46.67 | 3.74 | 10.80 | 20.31 | 0.63 | 39.07 | 3.00 | 34.75 | 29.57 | 3.82 | 9.65 | 3.89 | 5.05 | 4.14 | 5.54 |
| IC343973 | Control | 82.01 | 56.00 | 4.32 | 4.76 | 17.22 | 0.86 | 42.60 | 4.67 | 37.92 | 37.82 | 4.72 | 11.98 | 4.29 | 6.15 | 4.21 | 7.94 |
|  | Stress | 72.60 | 42.33 | 3.12 | 9.64 | 27.26 | 0.74 | 39.63 | 2.57 | 36.50 | 30.55 | 3.70 | 10.80 | 3.97 | 5.25 | 3.71 | 5.79 |
| IC393528 | Control | 83.13 | 58.48 | 4.19 | 5.05 | 11.23 | 0.76 | 43.10 | 3.67 | 39.58 | 37.40 | 5.45 | 12.25 | 4.36 | 5.95 | 4.52 | 6.92 |
|  | Stress | 70.22 | 46.77 | 3.13 | 15.76 | 18.53 | 0.47 | 39.43 | 2.67 | 37.67 | 32.45 | 3.62 | 9.87 | 3.93 | 5.30 | 4.07 | 5.54 |
| IC401376 | Control | 81.21 | 57.33 | 4.03 | 4.77 | 21.42 | 0.85 | 42.30 | 3.53 | 40.33 | 39.65 | 5.85 | 15.03 | 4.51 | 6.58 | 4.56 | 9.18 |
|  | Stress | 75.06 | 43.00 | 2.50 | 13.60 | 31.12 | 0.68 | 38.90 | 1.57 | 37.92 | 36.70 | 4.07 | 12.80 | 4.35 | 5.83 | 4.16 | 6.68 |
| IC426766 | Control | 85.38 | 54.11 | 4.00 | 5.34 | 11.30 | 0.80 | 43.00 | 2.80 | 38.17 | 34.73 | 5.18 | 14.40 | 4.45 | 6.10 | 4.38 | 9.57 |
|  | Stress | 76.79 | 42.23 | 2.62 | 11.60 | 23.11 | 0.64 | 41.83 | 1.72 | 36.42 | 32.83 | 3.82 | 11.35 | 3.86 | 5.15 | 3.93 | 6.84 |
| IC436508 | Control | 82.58 | 49.90 | 4.33 | 4.47 | 11.80 | 0.77 | 43.70 | 4.70 | 37.42 | 29.75 | 4.35 | 12.70 | 4.37 | 6.42 | 4.02 | 7.93 |
|  | Stress | 73.27 | 41.77 | 3.98 | 9.15 | 22.64 | 0.68 | 41.40 | 1.63 | 36.25 | 26.65 | 3.43 | 11.48 | 3.84 | 5.50 | 3.66 | 6.60 |
| IC436567 | Control | 72.61 | 54.00 | 4.42 | 3.90 | 13.94 | 0.84 | 44.83 | 4.87 | 37.58 | 30.95 | 5.33 | 13.68 | 4.35 | 6.34 | 3.86 | 7.86 |
|  | Stress | 68.59 | 42.00 | 3.01 | 8.63 | 21.42 | 0.54 | 42.43 | 2.80 | 36.25 | 27.93 | 4.02 | 10.93 | 4.03 | 5.32 | 3.45 | 6.25 |
| IC436606 | Control | 82.66 | 55.00 | 4.36 | 5.37 | 8.70 | 0.83 | 44.87 | 4.73 | 38.08 | 31.08 | 4.82 | 13.50 | 4.27 | 6.08 | 3.93 | 9.40 |
|  | Stress | 67.98 | 44.33 | 3.08 | 11.06 | 16.57 | 0.63 | 44.23 | 2.63 | 36.08 | 28.73 | 3.60 | 11.63 | 3.97 | 5.28 | 3.47 | 7.56 |
| IC436615 | Control | 86.12 | 55.00 | 4.13 | 4.67 | 19.50 | 0.82 | 44.63 | 4.43 | 38.00 | 32.33 | 4.96 | 13.03 | 4.10 | 6.03 | 4.30 | 6.86 |
|  | Stress | 78.22 | 42.33 | 3.07 | 11.83 | 31.29 | 0.70 | 40.67 | 2.97 | 36.58 | 29.95 | 3.80 | 11.28 | 3.78 | 4.98 | 3.76 | 5.72 |
| IC436621 | Control | 78.08 | 55.73 | 4.31 | 4.50 | 21.49 | 0.79 | 44.40 | 3.50 | 40.50 | 39.35 | 4.85 | 14.33 | 4.52 | 6.57 | 4.38 | 5.82 |
|  | Stress | 70.45 | 42.33 | 3.17 | 10.63 | 30.86 | 0.48 | 41.37 | 2.53 | 38.42 | 31.42 | 4.27 | 10.68 | 3.60 | 5.05 | 3.89 | 5.23 |
| IC436628 | Control | 83.04 | 56.67 | 4.22 | 4.66 | 11.21 | 0.81 | 45.80 | 3.53 | 38.58 | 32.40 | 4.28 | 13.15 | 3.99 | 5.85 | 4.24 | 7.75 |
|  | Stress | 76.92 | 42.50 | 3.20 | 9.30 | 20.51 | 0.79 | 43.93 | 2.37 | 37.00 | 26.30 | 3.50 | 9.82 | 3.71 | 5.15 | 3.67 | 6.34 |
| IC436632 | Control | 79.50 | 58.00 | 4.24 | 4.16 | 11.51 | 0.82 | 45.03 | 4.23 | 38.33 | 31.00 | 4.60 | 13.23 | 4.35 | 6.48 | 3.92 | 7.11 |
|  | Stress | 59.33 | 42.33 | 3.07 | 11.07 | 22.01 | 0.71 | 39.53 | 2.57 | 36.83 | 28.08 | 3.30 | 11.83 | 3.91 | 5.63 | 3.58 | 5.92 |
| IC436635 | Control | 87.86 | 55.33 | 3.96 | 3.33 | 15.86 | 0.85 | 44.30 | 5.40 | 44.83 | 36.17 | 5.45 | 14.50 | 4.53 | 6.12 | 3.55 | 5.22 |
|  | Stress | 67.82 | 41.00 | 3.12 | 9.58 | 25.80 | 0.67 | 42.80 | 2.97 | 43.42 | 29.07 | 4.38 | 12.08 | 3.53 | 4.92 | 2.95 | 4.31 |
| IC525175 | Control | 87.87 | 57.33 | 4.53 | 4.41 | 8.15 | 0.81 | 42.60 | 3.80 | 37.67 | 29.23 | 4.62 | 11.75 | 4.56 | 6.53 | 4.38 | 8.25 |
|  | Stress | 67.43 | 46.94 | 2.84 | 13.43 | 18.90 | 0.64 | 38.00 | 2.27 | 35.58 | 26.20 | 3.70 | 10.90 | 3.97 | 5.58 | 3.84 | 5.07 |
| IC546466 | Control | 84.46 | 58.00 | 4.45 | 4.87 | 13.38 | 0.76 | 43.00 | 5.77 | 38.58 | 43.33 | 4.32 | 12.08 | 4.83 | 6.95 | 4.57 | 10.10 |
|  | Stress | 77.76 | 47.67 | 3.11 | 13.65 | 21.74 | 0.74 | 40.60 | 3.17 | 37.42 | 41.53 | 3.57 | 9.32 | 4.37 | 5.80 | 3.80 | 7.54 |
| IC565254 | Control | 85.51 | 58.28 | 4.10 | 5.20 | 8.83 | 0.84 | 45.73 | 4.80 | 37.75 | 31.68 | 5.13 | 12.60 | 4.37 | 6.27 | 4.04 | 6.75 |
|  | Stress | 77.66 | 45.33 | 2.85 | 14.71 | 17.03 | 0.74 | 42.47 | 2.50 | 36.33 | 29.32 | 4.13 | 10.65 | 3.84 | 5.00 | 3.67 | 5.23 |
| IC565276 | Control | 86.00 | 57.00 | 4.16 | 4.79 | 15.22 | 0.84 | 43.17 | 3.80 | 42.83 | 49.03 | 5.90 | 9.83 | 4.44 | 5.82 | 4.27 | 5.97 |
|  | Stress | 77.55 | 43.00 | 3.01 | 11.50 | 26.55 | 0.74 | 39.17 | 2.40 | 40.92 | 43.03 | 4.52 | 9.08 | 3.69 | 4.85 | 3.79 | 3.61 |
| IC565286 | Control | 80.40 | 56.00 | 3.09 | 4.50 | 13.51 | 0.84 | 39.27 | 4.30 | 44.50 | 40.42 | 5.20 | 9.25 | 4.10 | 5.75 | 4.30 | 4.04 |
|  | Stress | 75.75 | 43.67 | 2.37 | 15.08 | 20.40 | 0.56 | 37.47 | 2.43 | 42.50 | 35.27 | 4.35 | 7.45 | 3.73 | 4.70 | 3.86 | 3.07 |
| IC565291 | Control | 91.62 | 55.49 | 3.77 | 6.60 | 7.61 | 0.83 | 46.83 | 4.40 | 44.42 | 52.12 | 5.89 | 7.47 | 3.97 | 5.18 | 3.75 | 3.78 |
|  | Stress | 72.41 | 41.33 | 3.13 | 11.50 | 19.34 | 0.68 | 41.73 | 2.73 | 42.50 | 44.80 | 4.78 | 6.77 | 3.58 | 4.30 | 3.35 | 2.63 |
| IPU0602 | Control | 82.14 | 58.00 | 3.95 | 5.49 | 10.44 | 0.79 | 44.53 | 2.40 | 37.58 | 25.22 | 4.57 | 11.30 | 4.59 | 6.28 | 4.37 | 7.23 |
|  | Stress | 74.44 | 46.00 | 2.54 | 12.62 | 22.04 | 0.58 | 41.23 | 1.67 | 36.17 | 23.35 | 3.20 | 7.35 | 4.31 | 5.30 | 3.84 | 5.63 |
| IPU101 | Control | 84.56 | 53.00 | 3.60 | 7.47 | 13.47 | 0.84 | 45.30 | 4.80 | 37.42 | 33.03 | 4.98 | 14.30 | 4.21 | 6.17 | 4.59 | 8.08 |
|  | Stress | 75.34 | 42.00 | 2.56 | 18.30 | 24.56 | 0.62 | 41.30 | 2.30 | 35.42 | 30.43 | 3.47 | 11.33 | 3.85 | 5.27 | 3.83 | 6.06 |
| IPU1023 | Control | 87.17 | 63.86 | 4.11 | 6.86 | 14.75 | 0.76 | 41.67 | 4.37 | 36.25 | 27.83 | 4.78 | 13.90 | 4.47 | 6.03 | 4.61 | 7.60 |
|  | Stress | 79.23 | 45.65 | 2.96 | 13.63 | 25.70 | 0.64 | 36.17 | 2.17 | 34.58 | 25.85 | 3.98 | 10.42 | 3.98 | 5.18 | 3.96 | 5.18 |
| IPU1026 | Control | 85.47 | 54.65 | 4.16 | 6.72 | 11.81 | 0.76 | 45.37 | 2.67 | 39.00 | 27.52 | 4.42 | 11.50 | 4.39 | 6.43 | 4.44 | 7.48 |
|  | Stress | 79.89 | 40.24 | 3.35 | 17.75 | 23.67 | 0.71 | 44.37 | 1.36 | 37.08 | 25.88 | 3.77 | 8.80 | 4.04 | 5.17 | 4.04 | 5.84 |
| IPU1033 | Control | 83.13 | 45.37 | 4.12 | 8.02 | 14.82 | 0.83 | 44.00 | 4.33 | 38.08 | 26.60 | 4.95 | 11.80 | 4.44 | 6.23 | 4.36 | 6.35 |
|  | Stress | 75.91 | 36.05 | 3.21 | 17.06 | 31.26 | 0.58 | 39.77 | 1.63 | 36.83 | 22.85 | 3.98 | 9.83 | 4.00 | 5.50 | 3.93 | 5.11 |
| IPU112 | Control | 83.08 | 62.98 | 3.92 | 7.95 | 14.22 | 0.79 | 43.33 | 4.07 | 36.42 | 26.40 | 3.67 | 12.48 | 4.48 | 6.60 | 4.36 | 6.39 |
|  | Stress | 77.01 | 47.95 | 3.02 | 18.56 | 21.52 | 0.68 | 41.33 | 1.47 | 34.33 | 22.65 | 2.97 | 8.03 | 4.19 | 5.65 | 3.86 | 5.26 |
| IPU116 | Control | 82.48 | 62.33 | 4.13 | 8.47 | 7.01 | 0.82 | 42.10 | 4.40 | 38.00 | 25.68 | 4.77 | 10.90 | 4.47 | 6.28 | 4.30 | 6.50 |
|  | Stress | 75.80 | 46.55 | 3.10 | 21.44 | 14.82 | 0.73 | 40.60 | 2.23 | 36.75 | 23.30 | 3.55 | 9.50 | 4.16 | 5.63 | 4.04 | 5.52 |
| IPU133 | Control | 87.93 | 50.26 | 3.94 | 8.81 | 11.90 | 0.84 | 41.50 | 4.43 | 37.75 | 24.55 | 4.73 | 9.33 | 4.28 | 6.07 | 4.14 | 6.91 |
|  | Stress | 81.53 | 42.00 | 3.23 | 17.64 | 25.75 | 0.66 | 40.53 | 1.47 | 36.50 | 19.95 | 2.77 | 6.80 | 3.88 | 5.37 | 3.80 | 5.06 |
| IPU136 | Control | 86.70 | 63.43 | 3.90 | 8.63 | 15.98 | 0.79 | 42.50 | 4.27 | 36.75 | 27.93 | 5.62 | 12.51 | 4.44 | 6.27 | 4.44 | 8.20 |
|  | Stress | 76.97 | 44.67 | 3.27 | 19.10 | 24.73 | 0.63 | 40.27 | 2.20 | 35.33 | 23.67 | 3.60 | 11.35 | 4.13 | 5.45 | 4.05 | 6.77 |
| IPU137 | Control | 77.50 | 57.00 | 4.76 | 8.30 | 13.13 | 0.84 | 42.67 | 4.93 | 37.50 | 24.48 | 4.87 | 8.98 | 4.65 | 6.63 | 4.54 | 6.51 |
|  | Stress | 72.43 | 42.00 | 3.32 | 14.81 | 23.46 | 0.64 | 37.73 | 3.27 | 36.08 | 22.93 | 3.55 | 7.68 | 4.00 | 5.67 | 4.14 | 5.35 |
| IPU237 | Control | 81.49 | 43.17 | 4.02 | 8.27 | 12.77 | 0.84 | 42.93 | 5.63 | 37.75 | 27.07 | 4.77 | 12.95 | 4.38 | 6.05 | 4.47 | 6.96 |
|  | Stress | 72.69 | 36.00 | 2.82 | 17.27 | 24.42 | 0.73 | 41.13 | 2.23 | 36.33 | 24.43 | 3.43 | 10.73 | 3.88 | 5.13 | 4.10 | 5.73 |
| IPU243 | Control | 87.77 | 50.09 | 4.56 | 4.92 | 10.22 | 0.80 | 41.03 | 4.47 | 37.50 | 26.35 | 4.12 | 12.05 | 4.47 | 6.28 | 4.37 | 9.36 |
|  | Stress | 80.17 | 42.00 | 3.32 | 16.87 | 21.07 | 0.66 | 37.90 | 3.27 | 36.25 | 21.53 | 2.88 | 10.52 | 3.90 | 5.48 | 3.89 | 6.90 |
| IPU73 | Control | 82.56 | 47.81 | 4.30 | 9.03 | 13.86 | 0.74 | 42.70 | 2.40 | 36.92 | 27.92 | 5.10 | 9.70 | 4.60 | 6.37 | 4.25 | 7.20 |
|  | Stress | 77.36 | 36.01 | 3.24 | 24.58 | 24.23 | 0.65 | 40.60 | 1.73 | 35.33 | 23.10 | 4.18 | 8.53 | 3.91 | 5.25 | 3.72 | 5.52 |
| IPU913 | Control | 79.99 | 58.49 | 4.21 | 7.22 | 13.29 | 0.73 | 42.43 | 2.50 | 38.00 | 26.23 | 4.65 | 13.35 | 4.24 | 6.18 | 3.91 | 8.49 |
|  | Stress | 74.82 | 42.06 | 2.74 | 19.62 | 22.56 | 0.47 | 39.20 | 1.80 | 36.00 | 20.82 | 3.05 | 7.50 | 3.62 | 4.97 | 3.48 | 6.48 |
| IPU916 | Control | 85.43 | 44.00 | 4.07 | 7.35 | 14.97 | 0.82 | 41.57 | 4.23 | 37.58 | 32.75 | 5.15 | 12.62 | 4.37 | 6.07 | 4.61 | 6.79 |
|  | Stress | 74.76 | 36.00 | 2.99 | 16.45 | 35.77 | 0.66 | 38.77 | 2.17 | 36.00 | 29.63 | 4.15 | 11.68 | 4.07 | 5.00 | 4.08 | 5.65 |
| IPU926 | Control | 79.28 | 57.19 | 4.30 | 6.94 | 12.83 | 0.74 | 49.00 | 4.70 | 38.92 | 25.33 | 4.78 | 10.85 | 4.48 | 6.32 | 4.30 | 7.72 |
|  | Stress | 72.00 | 41.33 | 3.42 | 17.59 | 25.45 | 0.71 | 40.03 | 2.47 | 37.08 | 23.68 | 3.82 | 8.65 | 4.15 | 5.62 | 3.88 | 6.73 |
| IPU941 | Control | 81.85 | 49.00 | 4.46 | 8.16 | 9.97 | 0.83 | 49.50 | 6.43 | 38.58 | 25.07 | 3.93 | 8.90 | 4.24 | 6.13 | 4.65 | 6.97 |
|  | Stress | 77.00 | 42.12 | 3.39 | 15.57 | 21.07 | 0.71 | 40.13 | 4.47 | 36.83 | 23.27 | 3.33 | 7.08 | 3.82 | 4.98 | 3.84 | 6.05 |
| IPU944 | Control | 85.42 | 46.00 | 3.98 | 5.06 | 13.47 | 0.83 | 44.47 | 2.43 | 38.33 | 25.35 | 5.17 | 10.70 | 4.15 | 5.77 | 4.31 | 6.93 |
|  | Stress | 77.00 | 38.10 | 3.04 | 14.54 | 28.60 | 0.63 | 42.27 | 1.73 | 36.75 | 23.65 | 4.25 | 8.07 | 3.71 | 4.97 | 3.93 | 5.32 |
| IPU9612 | Control | 79.56 | 52.88 | 4.09 | 5.40 | 15.71 | 0.79 | 49.37 | 4.50 | 39.08 | 41.90 | 5.40 | 11.88 | 4.62 | 6.75 | 4.48 | 9.52 |
|  | Stress | 74.40 | 41.73 | 2.72 | 15.06 | 26.37 | 0.67 | 46.80 | 3.63 | 37.00 | 40.55 | 4.05 | 10.53 | 4.10 | 5.63 | 3.96 | 8.26 |
| IPU99168 | Control | 88.43 | 43.04 | 4.49 | 6.29 | 9.00 | 0.80 | 43.70 | 3.67 | 38.33 | 29.12 | 5.65 | 11.45 | 4.44 | 6.45 | 4.31 | 7.86 |
|  | Stress | 76.99 | 34.67 | 3.48 | 13.85 | 18.97 | 0.72 | 38.77 | 1.37 | 36.92 | 25.48 | 3.38 | 9.07 | 3.95 | 5.35 | 3.81 | 6.03 |
| LBG623 | Control | 83.58 | 61.29 | 4.46 | 6.35 | 10.33 | 0.76 | 44.63 | 6.50 | 39.58 | 34.00 | 5.03 | 10.42 | 4.53 | 6.58 | 4.24 | 8.08 |
|  | Stress | 73.27 | 49.33 | 3.19 | 24.73 | 20.43 | 0.66 | 39.40 | 2.17 | 37.83 | 31.70 | 3.97 | 8.78 | 4.09 | 5.98 | 3.94 | 5.55 |
| LBG787 | Control | 82.64 | 50.00 | 4.30 | 8.05 | 11.19 | 0.83 | 41.97 | 5.67 | 38.58 | 27.65 | 5.03 | 10.33 | 4.64 | 6.32 | 4.21 | 7.85 |
|  | Stress | 74.38 | 44.33 | 2.88 | 18.40 | 29.95 | 0.56 | 40.83 | 2.57 | 36.92 | 25.60 | 3.95 | 8.03 | 4.35 | 5.67 | 3.81 | 6.03 |
| PDU1 | Control | 85.64 | 44.80 | 3.84 | 6.02 | 12.06 | 0.83 | 39.83 | 4.37 | 37.83 | 27.63 | 4.45 | 11.20 | 4.21 | 6.05 | 4.32 | 7.30 |
|  | Stress | 78.70 | 39.00 | 2.49 | 18.26 | 24.93 | 0.58 | 37.63 | 3.30 | 36.42 | 25.18 | 3.80 | 8.43 | 3.89 | 5.25 | 3.91 | 6.04 |
| PLU710 | Control | 87.24 | 48.09 | 4.18 | 6.42 | 10.00 | 0.69 | 41.50 | 3.43 | 37.33 | 30.42 | 4.65 | 13.17 | 4.23 | 5.93 | 4.42 | 7.54 |
|  | Stress | 79.76 | 37.00 | 3.01 | 16.15 | 23.79 | 0.62 | 36.73 | 1.43 | 36.00 | 25.38 | 4.05 | 9.10 | 4.03 | 5.13 | 4.00 | 6.39 |
| PLU826 | Control | 87.50 | 66.77 | 3.83 | 6.44 | 14.67 | 0.84 | 47.40 | 3.60 | 37.50 | 29.55 | 5.26 | 12.65 | 4.33 | 6.55 | 4.42 | 7.01 |
|  | Stress | 80.93 | 45.00 | 2.32 | 16.69 | 26.76 | 0.67 | 40.90 | 2.13 | 36.08 | 23.73 | 3.67 | 7.52 | 4.12 | 5.90 | 3.97 | 5.67 |
| PLU9606 | Control | 86.13 | 44.00 | 3.73 | 5.56 | 14.93 | 0.77 | 44.83 | 3.33 | 38.08 | 33.23 | 4.53 | 11.62 | 4.58 | 6.53 | 4.66 | 7.11 |
|  | Stress | 80.87 | 40.00 | 2.41 | 17.59 | 26.12 | 0.64 | 40.10 | 1.50 | 36.75 | 29.57 | 3.48 | 10.27 | 4.22 | 5.58 | 4.18 | 5.29 |
| PSRJ95016 | Control | 85.68 | 46.00 | 4.43 | 7.31 | 21.95 | 0.81 | 39.23 | 5.77 | 38.67 | 30.17 | 4.72 | 11.65 | 4.34 | 6.00 | 4.08 | 6.73 |
|  | Stress | 76.83 | 43.00 | 3.12 | 19.93 | 32.23 | 0.72 | 38.17 | 1.23 | 36.92 | 24.17 | 3.43 | 7.87 | 3.77 | 5.25 | 3.75 | 5.14 |
| STY2868 | Control | 87.66 | 41.06 | 3.98 | 8.19 | 16.13 | 0.80 | 40.57 | 5.43 | 37.92 | 29.52 | 4.77 | 12.85 | 4.49 | 6.33 | 4.24 | 7.67 |
|  | Stress | 81.27 | 36.96 | 3.07 | 24.73 | 28.47 | 0.73 | 39.03 | 2.37 | 36.33 | 27.45 | 3.75 | 9.02 | 3.93 | 5.22 | 3.88 | 5.61 |
| UH855 | Control | 89.69 | 45.41 | 4.34 | 7.58 | 13.52 | 0.80 | 43.20 | 4.80 | 37.92 | 30.53 | 5.02 | 13.65 | 4.44 | 5.83 | 4.22 | 6.33 |
|  | Stress | 85.40 | 40.33 | 3.61 | 16.78 | 27.69 | 0.76 | 37.63 | 2.67 | 36.17 | 25.82 | 3.70 | 9.38 | 3.86 | 4.93 | 3.83 | 5.59 |
| WBG108 | Control | 85.63 | 42.67 | 4.44 | 6.75 | 19.24 | 0.77 | 44.37 | 4.70 | 39.08 | 28.20 | 4.90 | 9.27 | 4.45 | 6.27 | 4.29 | 7.88 |
|  | Stress | 78.67 | 38.00 | 3.12 | 20.95 | 30.43 | 0.73 | 41.90 | 1.60 | 37.50 | 25.62 | 3.88 | 7.55 | 3.97 | 5.25 | 3.89 | 6.15 |
|  | **GM** | 79.74 | 48.28 | 3.59 | 10.16 | 18.44 | 0.73 | 42.01 | 3.34 | 36.19 | 31.01 | 4.76 | 11.06 | 4.46 | 5.78 | 4.04 | 7.05 |
|  | **CV(%)** | 1.86 | 2.70 | 8.04 | 5.12 | 6.15 | 3.09 | 3.21 | 11.25 | 2.37 | 5.28 | 16.42 | 11.07 | 4.44 | 8.13 | 6.51 | 11.35 |
|  | **LSD0.05** | 2.39 | 2.10 | 0.46 | 0.84 | 1.82 | 0.04 | 2.17 | 0.60 | 1.38 | 2.63 | 1.26 | 1.97 | 0.32 | 0.75 | 0.42 | 1.29 |

Where, RWC= relative water content (%), MSI= membrane stability index (%), Chlo= total chlorophyll content (mg/gm FW), proline (µg/g FW), TSS= total soluble sugar (mg/g FW), NDVI= normalized difference vegetation index, SPAD= chlorophyll meter reading (SCMR), CTD= Canopy Temperature Depression (°C), DF= days to 50% flowering, PH= Plant height (cm), BN= branch number, CN= cluster number, PL= pod length (cm), SPP= seeds per pod, HSW= hundred seed weight, SY= seed yield(g/plant), GM= grand mean, CV= coefficient of variance and LSD= Least Significant Difference.

**Table S5** Genotype mean, grand mean and LSD values for various morpho-physiological traits.

| Genotypes | RWC | MSI | Chlo | Proline | TSS | NDVI | SPAD | CTD | DF | PH | BN | CN | PL | SPP | HSW | SY |
| --- | --- | --- | --- | --- | --- | --- | --- | --- | --- | --- | --- | --- | --- | --- | --- | --- |
| COBG05 | 84.05 | 45.63 | 4.14 | 7.06 | 16.03 | 0.68 | 42.48 | 4.02 | 36.17 | 29.50 | 4.17 | 10.33 | 4.12 | 5.50 | 4.36 | 6.07 |
| IC257676 | 77.88 | 46.46 | 3.55 | 5.90 | 15.43 | 0.80 | 44.05 | 3.65 | 36.50 | 32.17 | 4.17 | 7.67 | 4.08 | 5.00 | 4.72 | 8.89 |
| IC261173 | 81.09 | 52.56 | 2.96 | 6.03 | 14.86 | 0.71 | 43.30 | 4.20 | 36.00 | 34.67 | 4.00 | 9.00 | 4.68 | 6.00 | 4.45 | 8.19 |
| IC268228 | 74.97 | 49.67 | 3.46 | 5.01 | 11.89 | 0.78 | 42.63 | 3.10 | 36.83 | 33.00 | 4.50 | 12.17 | 4.30 | 6.00 | 3.78 | 7.75 |
| IC274067 | 81.84 | 49.60 | 3.75 | 9.24 | 13.33 | 0.72 | 39.53 | 4.00 | 36.50 | 31.83 | 5.83 | 9.50 | 4.32 | 5.83 | 3.85 | 6.50 |
| IC274608 | 80.48 | 53.29 | 3.16 | 4.77 | 19.91 | 0.73 | 42.82 | 3.45 | 37.17 | 36.17 | 5.33 | 13.67 | 4.65 | 5.50 | 4.63 | 6.06 |
| IC321654 | 80.32 | 49.85 | 3.52 | 6.10 | 17.31 | 0.72 | 43.63 | 3.78 | 37.83 | 31.67 | 4.67 | 10.17 | 4.07 | 5.17 | 3.69 | 7.29 |
| IC321704 | 77.81 | 50.97 | 3.61 | 6.26 | 16.05 | 0.70 | 43.38 | 2.57 | 35.50 | 34.83 | 5.17 | 8.00 | 3.95 | 5.67 | 3.77 | 5.31 |
| IC321762 | 81.93 | 52.62 | 4.03 | 12.99 | 15.70 | 0.77 | 40.95 | 2.90 | 36.83 | 33.33 | 5.17 | 11.33 | 4.70 | 6.83 | 3.91 | 8.62 |
| IC331232 | 79.59 | 53.53 | 3.30 | 8.91 | 23.44 | 0.75 | 40.27 | 3.00 | 36.67 | 36.00 | 4.00 | 10.33 | 4.68 | 6.17 | 4.24 | 7.58 |
| IC331251 | 80.80 | 53.05 | 3.48 | 6.32 | 19.92 | 0.76 | 39.62 | 4.22 | 36.33 | 36.67 | 4.33 | 11.33 | 4.55 | 5.33 | 4.34 | 8.28 |
| IC337147 | 75.89 | 51.17 | 4.19 | 6.96 | 16.65 | 0.72 | 41.13 | 3.50 | 34.83 | 32.67 | 4.83 | 10.67 | 4.30 | 5.50 | 4.12 | 6.65 |
| IC343973 | 77.31 | 49.17 | 3.72 | 7.20 | 22.24 | 0.80 | 41.12 | 3.62 | 35.67 | 32.17 | 4.67 | 11.83 | 4.32 | 5.50 | 3.86 | 7.43 |
| IC393528 | 76.68 | 52.62 | 3.66 | 10.41 | 14.88 | 0.62 | 41.27 | 3.17 | 36.50 | 35.00 | 4.67 | 12.17 | 4.50 | 5.50 | 4.25 | 6.35 |
| IC401376 | 78.14 | 50.17 | 3.26 | 9.18 | 26.27 | 0.76 | 40.60 | 2.55 | 36.50 | 41.50 | 5.67 | 15.33 | 4.87 | 6.17 | 4.62 | 8.95 |
| IC426766 | 81.08 | 48.17 | 3.31 | 8.47 | 17.20 | 0.72 | 42.42 | 2.26 | 36.33 | 35.67 | 4.00 | 14.00 | 4.43 | 5.50 | 4.22 | 6.71 |
| IC436508 | 77.92 | 45.84 | 4.16 | 6.81 | 17.22 | 0.73 | 42.55 | 3.17 | 35.67 | 33.50 | 4.33 | 12.33 | 4.23 | 5.67 | 3.65 | 8.13 |
| IC436567 | 70.60 | 48.00 | 3.71 | 6.27 | 17.68 | 0.69 | 43.63 | 3.83 | 36.83 | 26.83 | 5.50 | 13.17 | 4.63 | 5.83 | 3.64 | 7.16 |
| IC436606 | 75.32 | 49.67 | 3.72 | 8.21 | 12.64 | 0.73 | 44.55 | 3.68 | 35.67 | 36.17 | 4.67 | 11.83 | 4.27 | 5.33 | 3.53 | 9.11 |
| IC436615 | 82.17 | 48.67 | 3.60 | 8.25 | 25.39 | 0.76 | 42.65 | 3.70 | 37.33 | 25.33 | 4.83 | 12.17 | 4.10 | 5.17 | 3.79 | 5.54 |
| IC436621 | 74.27 | 49.03 | 3.74 | 7.57 | 26.18 | 0.64 | 42.88 | 3.02 | 35.17 | 29.67 | 4.67 | 11.17 | 4.37 | 6.17 | 3.75 | 5.06 |
| IC436628 | 79.98 | 49.58 | 3.71 | 6.98 | 15.86 | 0.80 | 44.87 | 2.95 | 35.83 | 31.00 | 4.33 | 10.17 | 4.05 | 5.50 | 4.11 | 7.69 |
| IC436632 | 69.42 | 50.17 | 3.65 | 7.62 | 16.76 | 0.77 | 42.28 | 3.40 | 37.17 | 30.83 | 4.00 | 12.67 | 4.45 | 6.17 | 3.78 | 6.13 |
| IC436635 | 77.84 | 48.17 | 3.54 | 6.46 | 20.83 | 0.76 | 43.55 | 4.18 | 38.00 | 28.83 | 5.33 | 13.33 | 4.28 | 5.33 | 3.75 | 4.62 |
| IC525175 | 77.65 | 52.14 | 3.69 | 8.92 | 13.53 | 0.72 | 40.30 | 3.03 | 36.00 | 31.83 | 4.67 | 10.50 | 4.77 | 6.17 | 3.96 | 8.42 |
| IC546466 | 81.11 | 52.83 | 3.78 | 9.26 | 17.56 | 0.75 | 41.80 | 4.47 | 37.00 | 42.17 | 3.83 | 11.00 | 5.03 | 6.50 | 3.99 | 8.64 |
| IC565254 | 81.59 | 51.81 | 3.47 | 9.96 | 12.93 | 0.79 | 44.10 | 3.65 | 36.33 | 32.00 | 5.17 | 11.50 | 4.27 | 5.67 | 3.68 | 6.78 |
| IC565276 | 81.78 | 50.00 | 3.59 | 8.14 | 20.89 | 0.79 | 41.17 | 3.10 | 36.50 | 31.67 | 5.17 | 10.17 | 4.58 | 5.67 | 3.95 | 8.22 |
| IC565286 | 78.07 | 49.83 | 2.73 | 9.79 | 16.95 | 0.70 | 38.37 | 3.37 | 35.00 | 24.83 | 4.50 | 10.50 | 4.33 | 5.50 | 3.72 | 6.17 |
| IC565291 | 82.02 | 48.41 | 3.45 | 9.05 | 13.48 | 0.75 | 44.28 | 3.57 | 36.17 | 41.17 | 5.50 | 10.83 | 4.25 | 5.08 | 3.30 | 5.67 |
| IPU0602 | 78.29 | 52.00 | 3.25 | 9.06 | 16.24 | 0.69 | 42.88 | 2.03 | 37.00 | 26.67 | 4.17 | 10.00 | 4.95 | 5.83 | 4.14 | 6.67 |
| IPU101 | 79.95 | 47.50 | 3.08 | 12.88 | 19.02 | 0.73 | 43.30 | 3.55 | 35.33 | 29.67 | 4.50 | 13.33 | 4.32 | 5.83 | 4.01 | 7.29 |
| IPU1023 | 83.20 | 54.76 | 3.54 | 10.25 | 20.22 | 0.70 | 38.92 | 3.27 | 34.33 | 27.33 | 5.17 | 13.67 | 4.82 | 6.17 | 4.17 | 8.08 |
| IPU1026 | 82.68 | 47.44 | 3.76 | 12.24 | 17.74 | 0.74 | 44.87 | 2.01 | 36.83 | 31.50 | 4.83 | 10.00 | 4.63 | 6.00 | 4.41 | 7.02 |
| IPU1033 | 79.52 | 40.71 | 3.67 | 12.54 | 23.04 | 0.70 | 41.88 | 2.98 | 37.17 | 30.00 | 5.33 | 11.83 | 4.45 | 5.50 | 4.07 | 5.91 |
| IPU112 | 80.05 | 55.47 | 3.47 | 13.26 | 17.87 | 0.73 | 42.33 | 2.77 | 34.50 | 26.00 | 3.83 | 10.67 | 4.68 | 6.50 | 4.22 | 7.00 |
| IPU116 | 79.14 | 54.44 | 3.62 | 14.95 | 10.92 | 0.77 | 41.35 | 3.32 | 36.50 | 25.33 | 4.67 | 10.50 | 4.72 | 6.17 | 4.28 | 6.22 |
| IPU133 | 84.73 | 46.13 | 3.59 | 13.22 | 18.83 | 0.75 | 41.02 | 2.95 | 35.50 | 24.00 | 4.00 | 6.83 | 4.35 | 5.83 | 3.90 | 6.48 |
| IPU136 | 81.83 | 54.05 | 3.59 | 13.87 | 20.36 | 0.71 | 41.38 | 3.23 | 34.33 | 28.00 | 5.67 | 13.83 | 4.58 | 5.67 | 3.80 | 6.77 |
| IPU137 | 74.96 | 49.50 | 4.04 | 11.55 | 18.29 | 0.74 | 40.20 | 4.10 | 35.33 | 24.67 | 5.17 | 10.17 | 4.45 | 6.00 | 4.39 | 6.76 |
| IPU237 | 77.09 | 39.59 | 3.42 | 12.77 | 18.59 | 0.79 | 42.03 | 3.93 | 37.33 | 27.00 | 4.50 | 12.33 | 4.40 | 6.33 | 4.25 | 5.69 |
| IPU243 | 83.97 | 46.04 | 3.94 | 10.90 | 15.65 | 0.73 | 39.47 | 3.87 | 34.50 | 26.33 | 3.50 | 12.17 | 4.50 | 6.17 | 3.75 | 8.71 |
| IPU73 | 79.96 | 41.91 | 3.77 | 16.81 | 19.05 | 0.69 | 41.65 | 2.07 | 34.50 | 28.67 | 5.33 | 10.33 | 4.47 | 5.67 | 3.73 | 6.67 |
| IPU913 | 77.40 | 50.27 | 3.47 | 13.42 | 17.93 | 0.60 | 40.82 | 2.15 | 36.00 | 25.00 | 4.50 | 10.00 | 4.25 | 6.00 | 3.89 | 8.16 |
| IPU916 | 80.10 | 40.00 | 3.53 | 11.90 | 25.37 | 0.74 | 40.17 | 3.20 | 36.83 | 33.33 | 5.50 | 14.50 | 4.75 | 5.67 | 4.38 | 7.14 |
| IPU926 | 75.64 | 49.26 | 3.86 | 12.26 | 19.14 | 0.73 | 44.52 | 3.58 | 36.50 | 27.17 | 5.00 | 11.50 | 4.58 | 5.83 | 4.22 | 7.20 |
| IPU941 | 79.43 | 45.56 | 3.93 | 11.86 | 15.52 | 0.77 | 44.82 | 5.45 | 36.67 | 26.83 | 4.17 | 9.33 | 4.33 | 5.67 | 4.22 | 6.92 |
| IPU944 | 81.21 | 42.05 | 3.51 | 9.80 | 21.03 | 0.73 | 43.37 | 2.08 | 36.83 | 27.50 | 5.67 | 10.67 | 4.02 | 4.83 | 4.02 | 6.55 |
| IPU9612 | 76.98 | 47.30 | 3.41 | 10.23 | 21.04 | 0.73 | 48.08 | 4.07 | 36.83 | 45.00 | 5.00 | 11.67 | 4.67 | 6.33 | 4.07 | 7.73 |
| IPU99168 | 82.71 | 38.85 | 3.99 | 10.07 | 13.99 | 0.76 | 41.23 | 2.52 | 37.00 | 28.00 | 5.33 | 11.17 | 4.55 | 6.50 | 4.16 | 6.79 |
| LBG623 | 78.43 | 55.31 | 3.82 | 15.54 | 15.38 | 0.71 | 42.02 | 4.33 | 36.17 | 35.50 | 5.00 | 9.00 | 4.55 | 6.17 | 4.05 | 7.28 |
| LBG787 | 78.51 | 47.17 | 3.59 | 13.23 | 20.57 | 0.70 | 41.40 | 4.12 | 36.50 | 27.50 | 4.83 | 6.67 | 4.78 | 5.83 | 4.31 | 7.68 |
| PDU1 | 82.17 | 41.90 | 3.17 | 12.14 | 18.50 | 0.71 | 38.73 | 3.83 | 36.00 | 25.67 | 4.50 | 9.83 | 4.25 | 5.50 | 3.83 | 6.84 |
| PLU710 | 83.50 | 42.55 | 3.60 | 11.28 | 16.90 | 0.66 | 39.12 | 2.43 | 35.83 | 28.00 | 4.50 | 10.67 | 4.40 | 5.17 | 4.01 | 6.13 |
| PLU826 | 84.21 | 55.88 | 3.07 | 11.57 | 20.71 | 0.75 | 44.15 | 2.87 | 34.33 | 31.83 | 5.50 | 10.67 | 4.55 | 6.50 | 4.13 | 8.19 |
| PLU9606 | 83.50 | 42.00 | 3.07 | 11.57 | 20.53 | 0.71 | 42.47 | 2.42 | 35.83 | 35.00 | 4.17 | 11.33 | 4.85 | 6.17 | 4.21 | 6.26 |
| PSRJ95016 | 81.25 | 44.50 | 3.77 | 13.62 | 27.09 | 0.77 | 38.70 | 3.50 | 36.33 | 28.83 | 4.50 | 9.17 | 4.38 | 5.50 | 3.87 | 6.82 |
| STY2868 | 84.47 | 39.01 | 3.53 | 16.46 | 22.30 | 0.77 | 39.80 | 3.90 | 36.50 | 31.67 | 4.67 | 12.67 | 4.53 | 6.00 | 4.12 | 7.03 |
| UH855 | 87.55 | 42.87 | 3.97 | 12.18 | 20.60 | 0.78 | 40.42 | 3.73 | 36.33 | 28.50 | 5.17 | 11.83 | 4.42 | 5.17 | 4.20 | 4.92 |
| WBG108 | 82.15 | 40.33 | 3.78 | 13.85 | 24.83 | 0.75 | 43.13 | 3.15 | 36.83 | 27.17 | 5.33 | 8.67 | 4.32 | 5.67 | 4.24 | 8.13 |
| **GM** | 79.74 | 48.28 | 3.59 | 10.16 | 18.44 | 0.73 | 42.01 | 3.34 | 36.19 | 31.01 | 4.76 | 11.06 | 4.46 | 5.78 | 4.04 | 7.05 |
| **CV (%)** | 1.86 | 2.7 | 8.04 | 5.12 | 6.15 | 3.09 | 3.21 | 11.25 | 2.37 | 5.28 | 16.42 | 11.07 | 4.44 | 8.13 | 6.51 | 11.35 |
| **LSD0.05** | 1.69 | 1.48 | 0.33 | 0.59 | 1.29 | 0.03 | 1.53 | 0.43 | 0.97 | 1.86 | 0.89 | 1.39 | 0.23 | 0.54 | 0.3 | 0.91 |

Where, RWC= relative water content (%), MSI= membrane stability index (%), Chlo= total chlorophyll content (mg/gm FW), proline (µg/g FW), TSS= total soluble sugar (mg/g FW), NDVI= normalized difference vegetation index, SPAD= chlorophyll meter reading (SCMR), CTD= Canopy Temperature Depression (°C), DF= days to 50% flowering, PH= Plant height (cm), BN= branch number, CN= cluster number, PL= pod length (cm), SPP= seeds per pod, HSW= hundred seed weight, SY= seed yield(g/plant), GM= grand mean, CV= coefficient of variance and LSD= Least Significant Difference.

**Table S6** Details of 130 polymorphic SSR primers used for the molecular study of the 60 black gram genotypes

| Marker name | Original marker id | Product size | Major Allele Frequency | Allele  No | Gene Diversity | PIC |
| --- | --- | --- | --- | --- | --- | --- |
| VmGEN1 | SSR22941 | 150-157 | 0.52 | 2 | 0.50 | 0.37 |
| VmGEN2 | SSR22942 | 150-157 | 0.57 | 2 | 0.49 | 0.37 |
| VmGEN3 | SSR14660 | 157-166 | 0.75 | 2 | 0.38 | 0.30 |
| VmGEN4 | SSR13198 | 154-204 | 0.50 | 6 | 0.69 | 0.66 |
| VmGEN5 | SSR9277 | 138-147 | 0.57 | 2 | 0.49 | 0.37 |
| VmGEN8 | SSR12492 | 138-150 | 0.50 | 2 | 0.50 | 0.38 |
| VmGEN9 | SSR26991 | 141-141 | 1.00 | 1 | 0.00 | 0.00 |
| VmGEN10 | SSR1022 | 160-170 | 0.65 | 2 | 0.46 | 0.35 |
| VmGEN11 | SSR26513 | 150-157 | 0.65 | 2 | 0.46 | 0.35 |
| VmGEN12 | SSR25234 | 135-160 | 0.65 | 3 | 0.48 | 0.39 |
| VmGEN13 | SSR16014 | 135-144 | 0.55 | 2 | 0.50 | 0.37 |
| VmGEN14 | SSR1084 | 135-160 | 0.47 | 3 | 0.57 | 0.48 |
| VmGEN15 | SSR29430 | 144-154 | 0.75 | 2 | 0.38 | 0.30 |
| VmGEN16 | SSR29525 | 150-163 | 0.73 | 2 | 0.39 | 0.31 |
| VmGEN17 | SSR14760 | 150-157 | 0.53 | 2 | 0.50 | 0.37 |
| VmGEN18 | SSR24894 | 144-163 | 0.43 | 3 | 0.65 | 0.57 |
| VmGEN19 | SSR24895 | 138-160 | 0.37 | 3 | 0.66 | 0.59 |
| VmGEN20 | SSR4726 | 160-166 | 0.57 | 2 | 0.49 | 0.37 |
| VmGEN21 | SSR13003 | 154-160 | 0.52 | 2 | 0.50 | 0.37 |
| VmGEN22 | SSR4265 | 126-141 | 0.50 | 3 | 0.56 | 0.46 |
| VmGEN23 | SSR33263 | 132-141 | 0.52 | 2 | 0.50 | 0.37 |
| VmGEN25 | SSR22802 | 253-260 | 0.62 | 2 | 0.47 | 0.36 |
| VmGEN26 | SSR14732 | 144-154 | 0.70 | 2 | 0.42 | 0.33 |
| VmGEN27 | SSR15024 | 132-150 | 0.40 | 3 | 0.64 | 0.56 |
| VmGEN28 | SSR14684 | 150-163 | 0.52 | 3 | 0.52 | 0.40 |
| VmGEN29 | SSR31500 | 235-250 | 0.43 | 3 | 0.62 | 0.53 |
| VmGEN30 | SSR9767 | 160-170 | 0.57 | 2 | 0.49 | 0.37 |
| VmGEN31 | SSR24811 | 150-173 | 0.52 | 3 | 0.61 | 0.54 |
| VmGEN33 | SSR30447 | 138-144 | 0.63 | 2 | 0.46 | 0.36 |
| VmGEN34 | SSR6001 | 150-160 | 0.80 | 2 | 0.32 | 0.27 |
| VmGEN35 | SSR33061 | 147-163 | 0.50 | 3 | 0.62 | 0.54 |
| VmGEN37 | SSR19630 | 154-163 | 0.67 | 2 | 0.44 | 0.35 |
| VmGEN38 | SSR7610 | 141-154 | 0.65 | 2 | 0.46 | 0.35 |
| VmGEN39 | SSR28109 | 144-157 | 0.53 | 2 | 0.50 | 0.37 |
| VmGEN40 | SSR5955 | 144-154 | 0.65 | 2 | 0.46 | 0.35 |
| VmGEN41 | SSR4921 | 129-138 | 0.68 | 2 | 0.43 | 0.34 |
| VmGEN42 | SSR31285 | 150-163 | 0.53 | 2 | 0.50 | 0.37 |
| VmGEN43 | SSR31071 | 154-173 | 0.43 | 3 | 0.62 | 0.53 |
| VmGEN44 | SSR9842 | 154-170 | 0.60 | 3 | 0.56 | 0.50 |
| VmGEN46 | SSR14563 | 154-163 | 0.52 | 2 | 0.50 | 0.37 |
| VmGEN47 | SSR16796 | 154-163 | 0.62 | 2 | 0.47 | 0.36 |
| VmGEN48 | SSR5397 | 144-154 | 0.50 | 2 | 0.50 | 0.38 |
| VmGEN50 | SSR32416 | 132-144 | 0.90 | 2 | 0.18 | 0.16 |
| VmGEN51 | SSR9728 | 147-154 | 0.53 | 2 | 0.50 | 0.37 |
| VmGEN52 | SSR13909 | 144-160 | 0.58 | 2 | 0.49 | 0.37 |
| VmGEN54 | SSR11982 | 275-304 | 0.40 | 4 | 0.69 | 0.64 |
| VmGEN55 | SSR15165 | 150-157 | 0.60 | 2 | 0.48 | 0.36 |
| VmGEN56 | SSR831 | 163-173 | 0.75 | 2 | 0.38 | 0.30 |
| VmGEN57 | SSR12112 | 154-170 | 0.67 | 3 | 0.46 | 0.38 |
| VmGEN58 | SSR2672 | 154-180 | 0.62 | 4 | 0.55 | 0.50 |
| VmGEN61 | SSR3877 | 150-160 | 0.83 | 2 | 0.28 | 0.24 |
| VmGEN62 | SSR14471 | 160-170 | 0.63 | 2 | 0.46 | 0.36 |
| VmGEN63 | SSR13812 | 160-170 | 0.62 | 2 | 0.47 | 0.36 |
| VmGEN64 | SSR10540 | 150-160 | 0.58 | 2 | 0.49 | 0.37 |
| VmGEN65 | SSR4313 | 141-154 | 0.50 | 2 | 0.50 | 0.38 |
| VmGEN66 | SSR7496 | 147-154 | 0.60 | 2 | 0.48 | 0.36 |
| VmGEN67 | SSR11862 | 144-154 | 0.63 | 2 | 0.46 | 0.36 |
| VmGEN68 | SSR7609 | 138-150 | 0.58 | 3 | 0.50 | 0.39 |
| VmEST1 | VMgSSR910 | 186-210 | 0.42 | 5 | 0.74 | 0.70 |
| VmEST2 | VMgSSR291 | 210-218 | 0.58 | 3 | 0.57 | 0.51 |
| VmEST3 | VMgSSR778 | 170-180 | 0.42 | 3 | 0.66 | 0.58 |
| VmEST4 | VMgSSR666 | 330-350 | 0.53 | 3 | 0.59 | 0.52 |
| VmEST5 | VMgSSR589 | 229-247 | 0.37 | 3 | 0.66 | 0.59 |
| VmEST6 | VMgSSR216 | 260-288 | 0.42 | 3 | 0.66 | 0.58 |
| VmEST8 | VMgSSR862 | 163-180 | 0.67 | 2 | 0.44 | 0.35 |
| VmEST9 | VMgSSR146 | 166-190 | 0.58 | 3 | 0.53 | 0.45 |
| VmEST10 | VMgSSR181 | 240-260 | 0.55 | 3 | 0.59 | 0.51 |
| VmEST11 | VMgSSR247 | 350-380 | 0.33 | 4 | 0.74 | 0.69 |
| VmEST12 | VMgSSR252 | 224-243 | 0.42 | 3 | 0.63 | 0.55 |
| VmEST13 | VMgSSR1 | 265-324 | 0.40 | 3 | 0.66 | 0.59 |
| VmEST18 | VMgSSR17 | 190-218 | 0.47 | 3 | 0.62 | 0.54 |
| VmEST19 | VMgSSR48 | 334-350 | 0.47 | 3 | 0.64 | 0.57 |
| VmEST20 | VMgSSR58 | 218-250 | 0.43 | 4 | 0.68 | 0.62 |
| VmEST21 | VMgSSR630 | 327-377 | 0.43 | 4 | 0.66 | 0.59 |
| VmEST22 | VMgSSR532 | 334-370 | 0.30 | 4 | 0.75 | 0.70 |
| VmEST23 | VMgSSR577 | 288-337 | 0.62 | 3 | 0.54 | 0.48 |
| VmEST25 | VMgSSR389 | 135-150 | 0.48 | 3 | 0.63 | 0.56 |
| VmEST26 | VMgSSR454 | 337-374 | 0.27 | 5 | 0.79 | 0.75 |
| VmEST27 | VMgSSR502 | 334-360 | 0.45 | 4 | 0.68 | 0.62 |
| VmEST28 | VMgSSR544 | 340-374 | 0.35 | 4 | 0.72 | 0.66 |
| VmEST29 | VMgSSR238 | 384-394 | 0.53 | 2 | 0.50 | 0.37 |
| VmEST31 | VMgSSR627 | 310-340 | 0.35 | 4 | 0.71 | 0.65 |
| VmEST33 | VMgSSR588 | 108-117 | 0.50 | 2 | 0.50 | 0.38 |
| VmEST34 | VMgSSR321 | 645-700 | 0.45 | 3 | 0.65 | 0.57 |
| VmEST35 | VMgSSR426 | 586-671 | 0.35 | 6 | 0.75 | 0.71 |
| VmEST36 | VMgSSR811 | 154-190 | 0.43 | 4 | 0.67 | 0.60 |
| VmEST37 | VMgSSR853 | 147-163 | 0.37 | 3 | 0.66 | 0.59 |
| VmEST38 | VMgSSR808 | 122-132 | 0.72 | 2 | 0.41 | 0.32 |
| VmEST40 | VMgSSR729 | 346-394 | 0.38 | 4 | 0.72 | 0.67 |
| VmEST41 | VMgSSR683 | 304-334 | 0.47 | 3 | 0.64 | 0.57 |
| VmEST42 | VMgSSR701 | 474-526 | 0.47 | 4 | 0.67 | 0.62 |
| VmEST44 | VMgSSR9 | 304-330 | 0.28 | 4 | 0.75 | 0.70 |
| VmEST45 | VMgSSR14 | 129-138 | 0.53 | 2 | 0.50 | 0.37 |
| VmEST46 | VMgSSR29 | 313-334 | 0.52 | 3 | 0.61 | 0.53 |
| VmEST47 | VMgSSR32 | 240-250 | 0.55 | 2 | 0.50 | 0.37 |
| VmEST48 | VMgSSR697 | 586-653 | 0.27 | 6 | 0.81 | 0.78 |
| VmEST49 | VMgSSR564 | 521-575 | 0.32 | 5 | 0.76 | 0.73 |
| VmEST50 | VMgSSR450 | 400-440 | 0.48 | 3 | 0.62 | 0.54 |
| VmgEST8 | VMgSSR14 | 150-186 | 0.47 | 4 | 0.61 | 0.53 |
| VmgEST10 | VMgSSR17 | 190-235 | 0.33 | 4 | 0.72 | 0.66 |
| VmgEST11 | VMgSSR23 | 412-432 | 0.43 | 4 | 0.67 | 0.60 |
| VmgEST14 | VMgSSR31 | 282-295 | 0.43 | 3 | 0.62 | 0.55 |
| VmgEST15 | VMgSSR33 | 271-288 | 0.40 | 4 | 0.68 | 0.62 |
| VmgEST16 | VMgSSR34 | 204-215 | 0.45 | 3 | 0.63 | 0.55 |
| VmgEST23 | VMgSSR54 | 394-408 | 0.35 | 3 | 0.67 | 0.59 |
| VmgEST25 | VMgSSR57 | 224-250 | 0.43 | 5 | 0.72 | 0.67 |
| VmgEST33 | VMgSSR76 | 667-695 | 0.52 | 4 | 0.65 | 0.60 |
| VmgEST58 | VMgSSR138 | 304-319 | 0.50 | 3 | 0.62 | 0.55 |
| VmgEST60 | VES0019 | 235-256 | 0.45 | 3 | 0.64 | 0.57 |
| VmgEST61 | VES0287 | 194-221 | 0.23 | 6 | 0.82 | 0.79 |
| VmgEST66 | D102666 | 608-622 | 0.37 | 3 | 0.66 | 0.59 |
| VmgEST72 | VMgSSR143 | 132-154 | 0.33 | 4 | 0.73 | 0.68 |
| VmgEST75 | VMgSSR149 | 170-190 | 0.37 | 4 | 0.73 | 0.68 |
| VmgEST81 | VMgSSR158 | 105-117 | 0.48 | 3 | 0.63 | 0.55 |
| VmgEST70 | CLM451 | 320-348 | 0.33 | 4 | 0.72 | 0.66 |
| VmgEST69 | CLM446 | 176-191 | 0.52 | 3 | 0.62 | 0.55 |
| VmgEST50 | VMgSSR118 | 216-233 | 0.38 | 4 | 0.69 | 0.63 |
| VmgEST49 | VMgSSR112 | 210-224 | 0.45 | 3 | 0.64 | 0.56 |
| VmgEST48 | VMgSSR109 | 108-115 | 0.57 | 2 | 0.49 | 0.37 |
| VmgEST83 | VMgSSR161 | 217-229 | 0.48 | 3 | 0.63 | 0.56 |
| VmgEST2 | VMgSSR4 | 156-178 | 0.43 | 4 | 0.64 | 0.57 |
| VmgEST80 | VMgSSR157 | 624-672 | 0.35 | 4 | 0.68 | 0.61 |
| VmgEST71 | VMgSSR142 | 139-146 | 0.52 | 2 | 0.50 | 0.37 |
| VmgEST73 | VMgSSR145 | 170-179 | 0.50 | 2 | 0.50 | 0.38 |
| VmgEST74 | VMgSSR147 | 404-418 | 0.42 | 3 | 0.64 | 0.56 |
| VmgEST77 | VMgSSR152 | 238-253 | 0.47 | 3 | 0.64 | 0.57 |
| VmgEST78 | VMgSSR153 | 443-473 | 0.38 | 3 | 0.66 | 0.59 |
| VmgEST79 | VMgSSR156 | 641-807 | 0.27 | 7 | 0.80 | 0.77 |
| VmgEST82 | VMgSSR160 | 288-307 | 0.32 | 4 | 0.74 | 0.69 |
| VmgEST84 | VMgSSR163 | 357-393 | 0.35 | 4 | 0.73 | 0.68 |
| **Mean** |  |  | **0.50** | **2.99** | **0.57** | **0.49** |
